# Supplementary material
Source: publisher site journal article supplement (https://www.dovepress.com/article/413680)
Supplement: Supplementary file 1 [file get_supplementary_file.php]

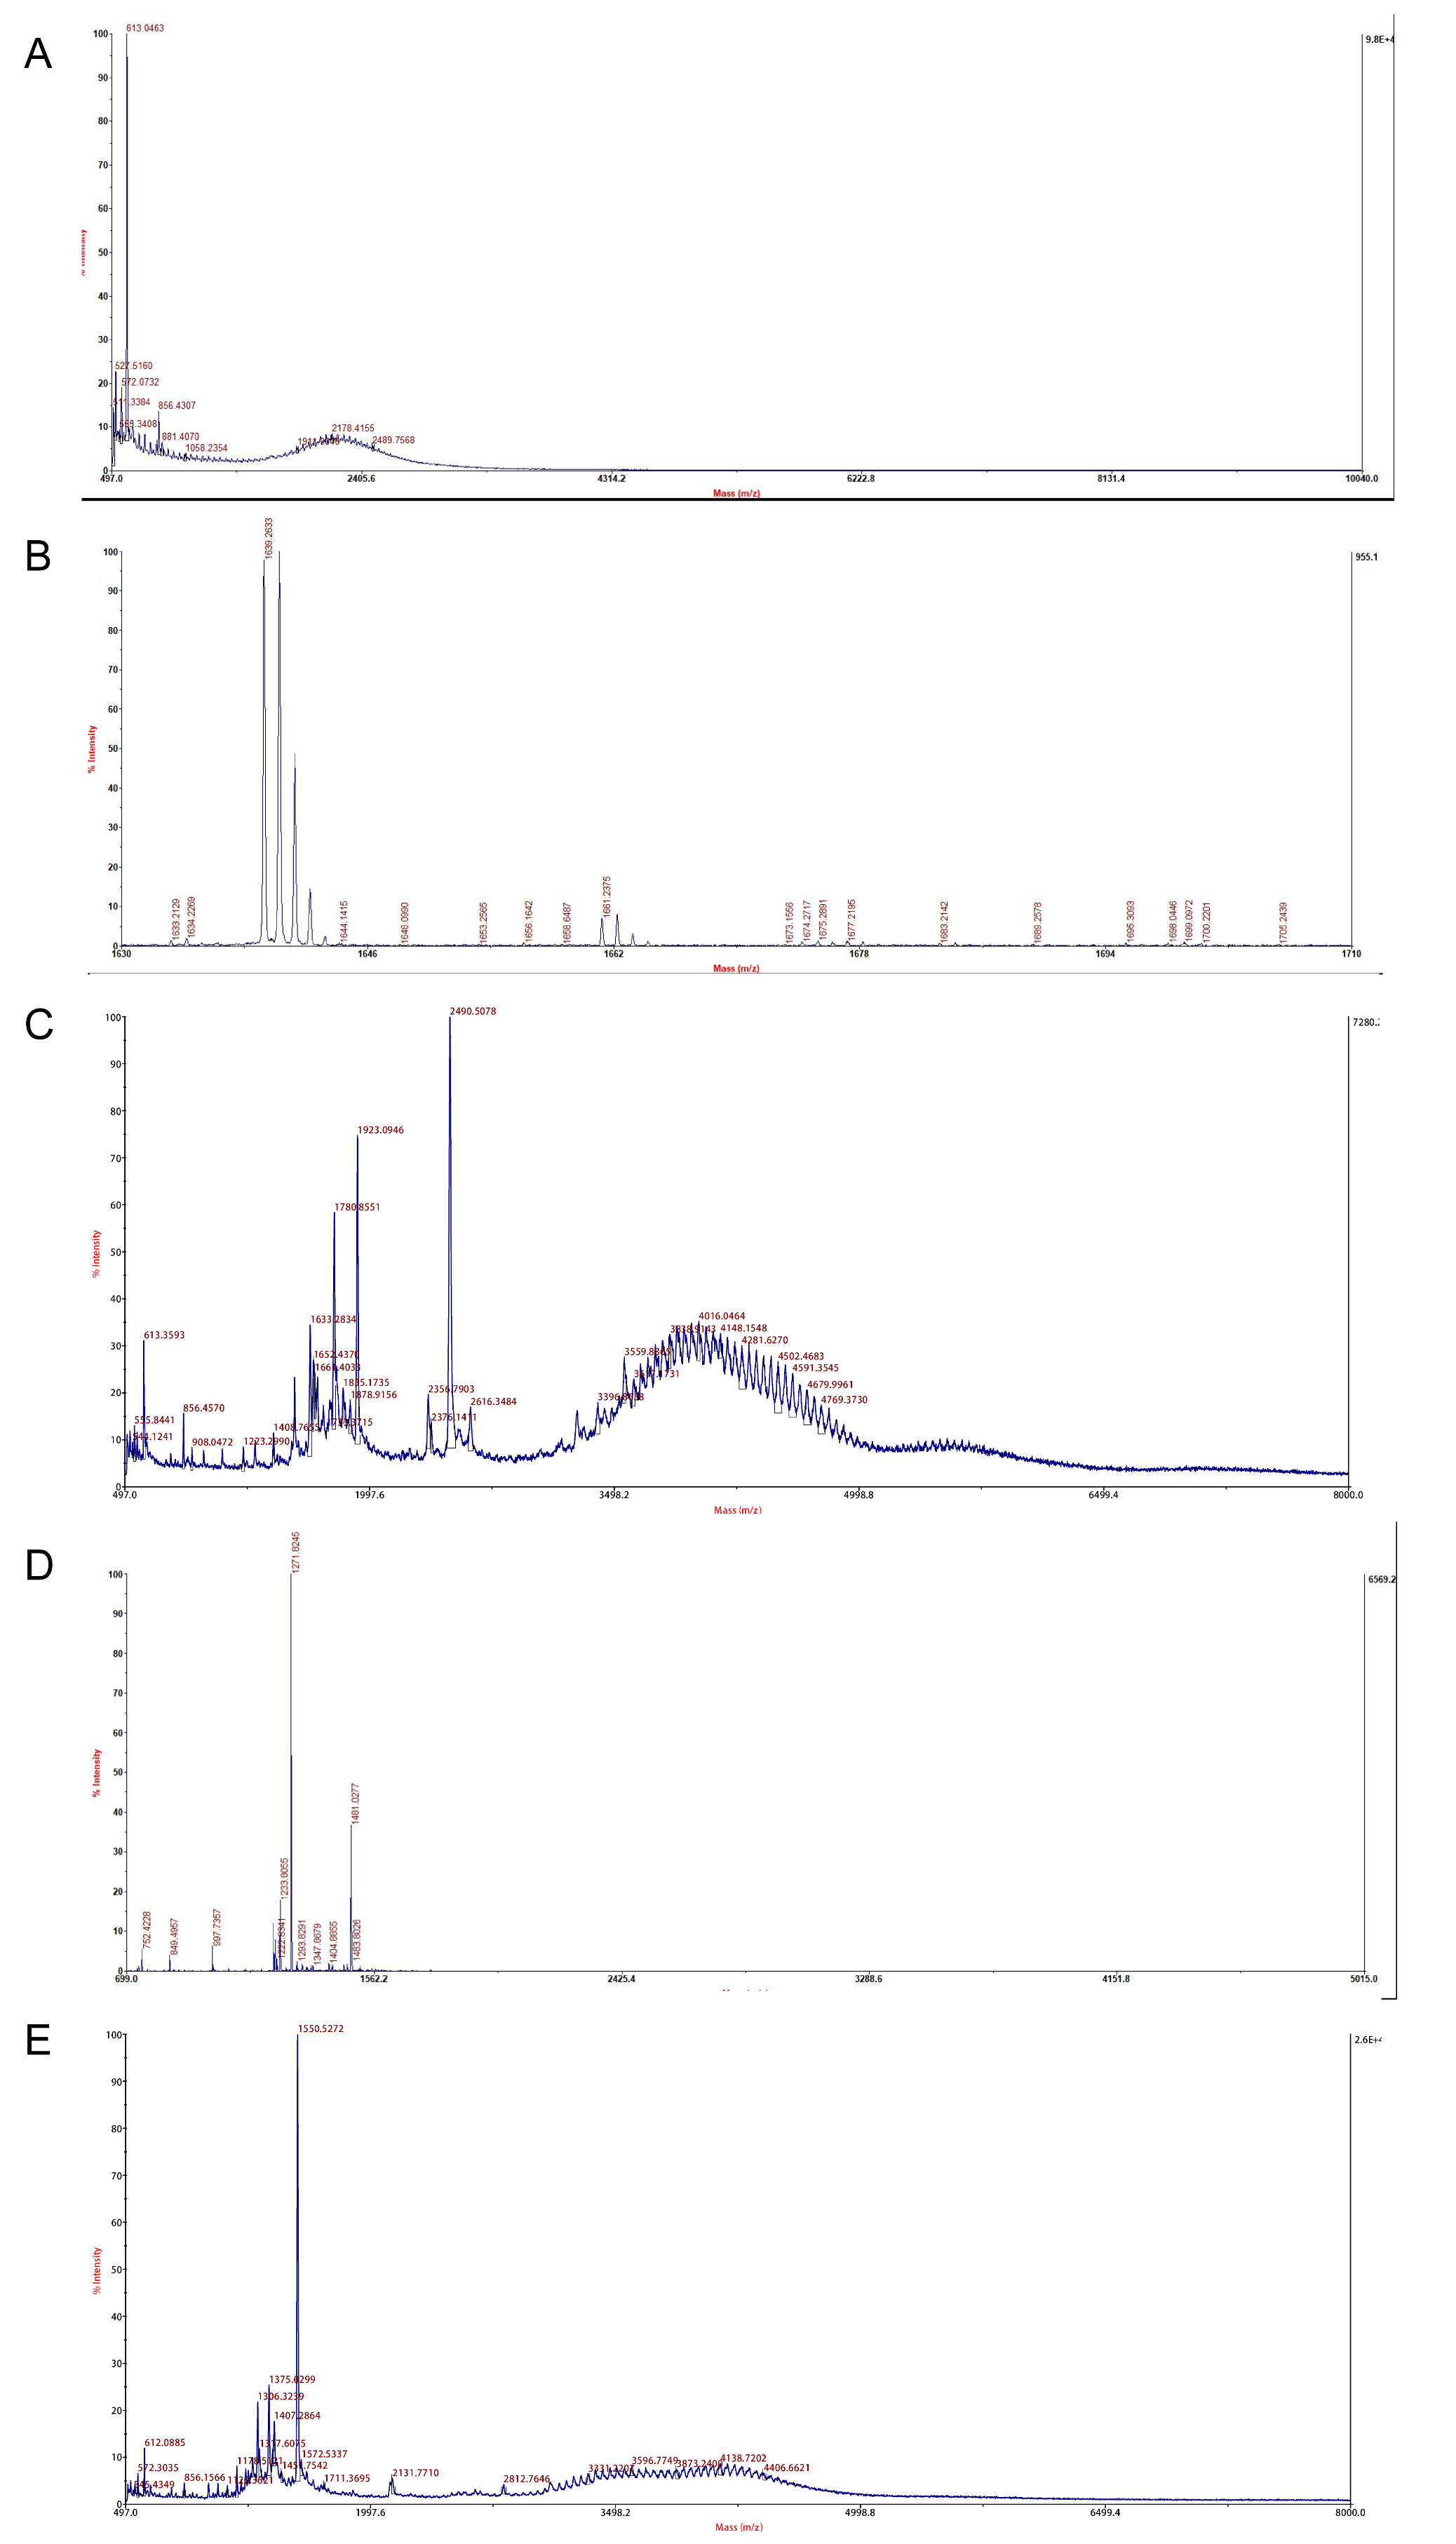


Figure S1 MALDI–TOF mass spectra of (A) DSPE-PEG2K-COOH; (B) MLS; (C) DSPE-PEG2K-MLS; (D) NLS; (E) DSPE-PEG2K-NLS


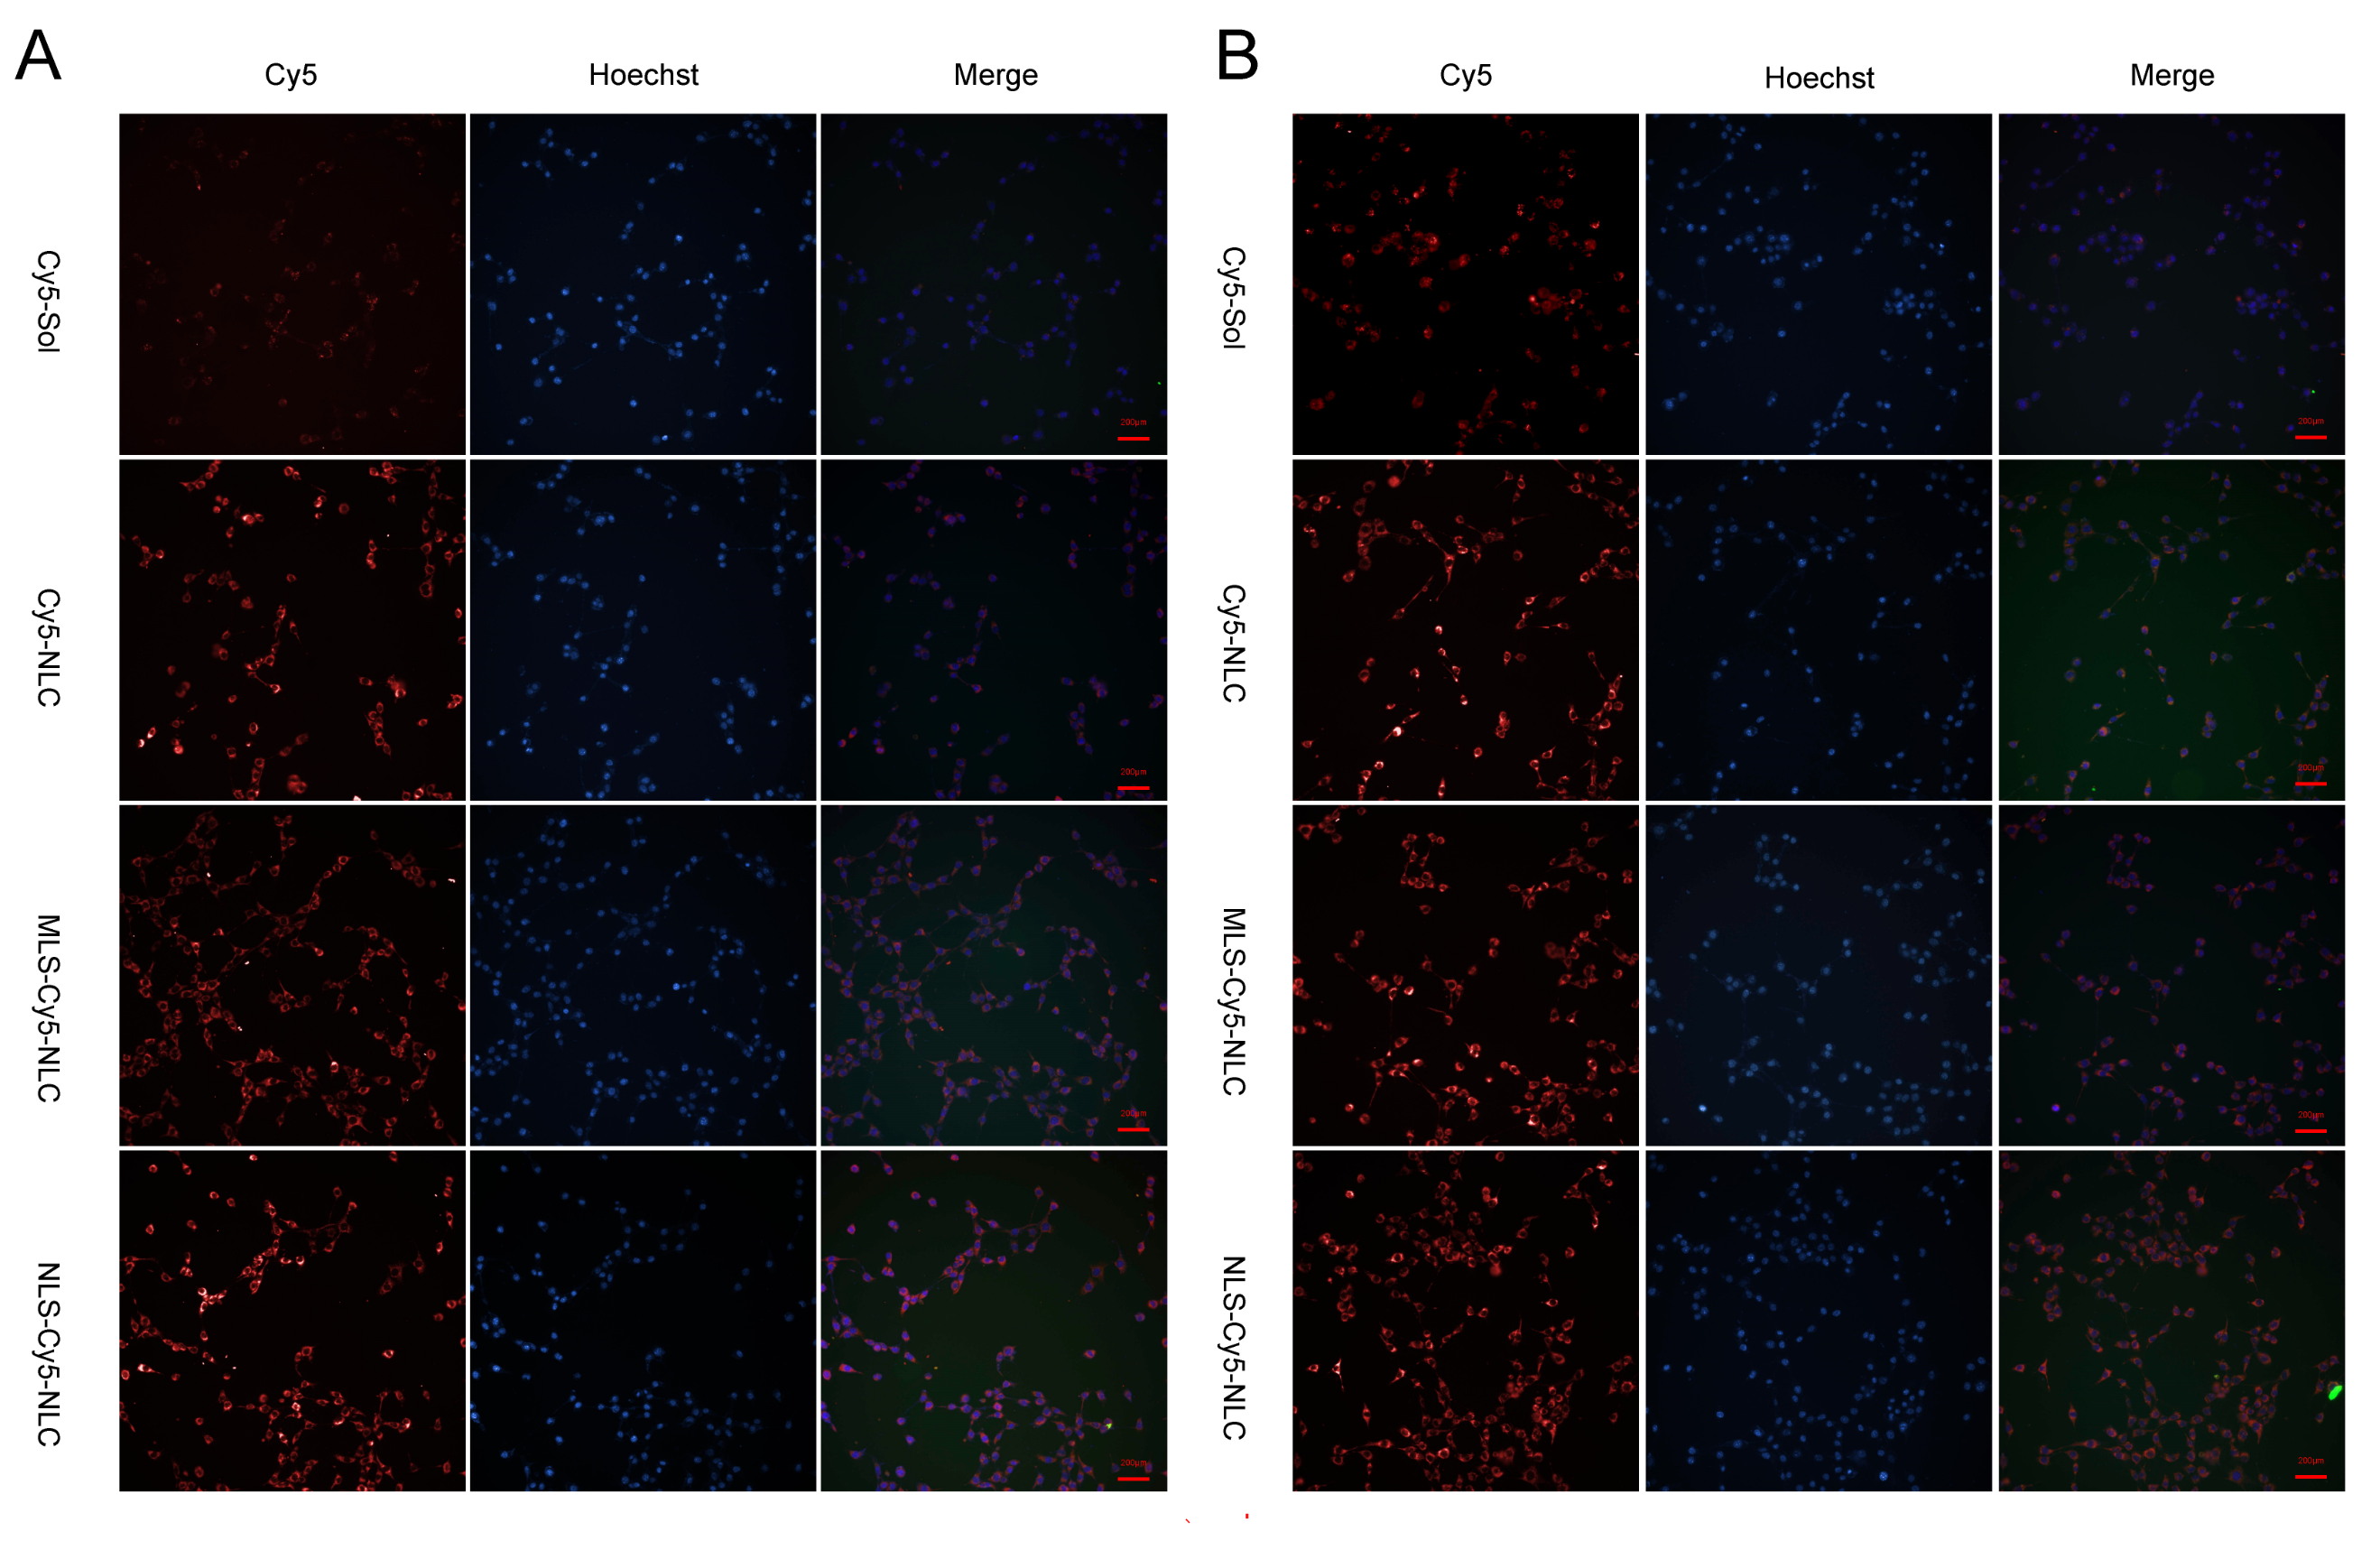


Figure S2 A-B: The cellular uptake in 4T1 cells after treatment with Cy5-loaded modified and unmodified NLCs (A: 2 h, B: 6 h, Scale bar = 200 μm)


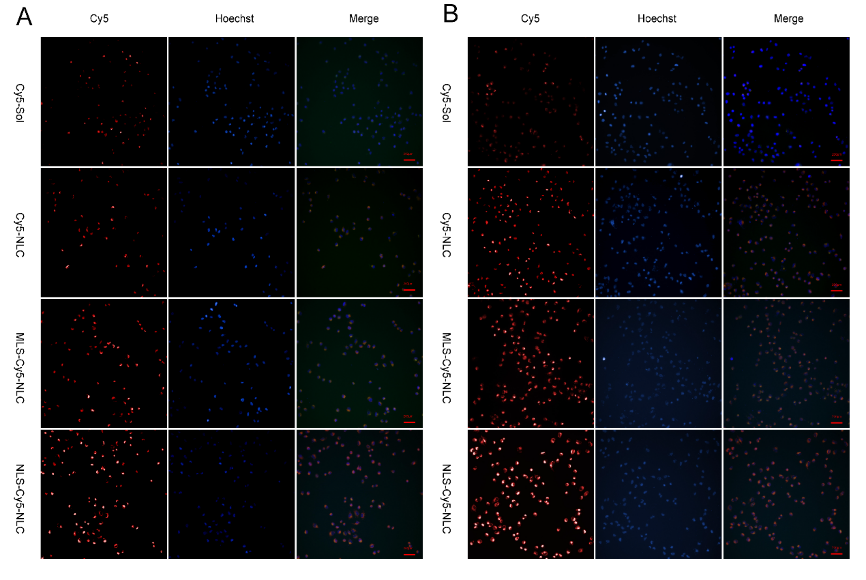


Figure S3 A-B: The cellular uptake in MDA-MB-231 cells after treatment with Cy5-loaded modified and unmodified NLCs (A: 2 h, B: 6 h, Scale bar = 200 μm)
